# Supplementary material
Source: publisher site journal article supplement (https://www.spandidos-publications.com/5107/downloadSupplementary)
Supplement: Supplementary file 1 [file downloadSupplementary]

## Sheet: Table S10
Table SX. The correlation of DNase expression and the stromal score in different cancer types.
Cancer type	DNASE1	DNASE1L1	DNASE1L2	DNASE1L3	DNASE2	DNASE2B
ACC	-0.279552	-0.106256	-0.62186	0.404674	0.0496835	0.0593666
BLCA	-0.320967	0.0539392	-0.291412	0.440554	0.15795	0.0962164
BRCA	-0.071711	0.0122959	-0.189058	0.408295	-0.153177	0.253877
CESC	-0.0638903	0.0234672	-0.11992	0.173655	0.100377	0.265355
CHOL	-0.0774775	0.110425	-0.0478764	0.348005	0.0661519	0.385739
COAD	-0.0936074	0.00183135	-0.183057	0.0569027	0.220574	0.0616766
DLBC	-0.0884716	0.206578	-0.378637	-0.0551455	0.424338	0.30436
ESCA	-0.0915899	-0.113699	-0.0800594	-0.0439609	0.200337	0.114766
GBM	-0.428764	0.595343	-0.327724	0.207429	0.510875	0.0114673
HNSC	-0.243185	0.168646	-0.118247	0.0662446	0.0705569	0.416161
KICH	-0.00690559	-0.256163	-0.395323	0.358829	-0.0719843	0.28514
KIRC	-0.238363	-0.00636072	-0.279222	0.213318	0.0637869	0.251154
KIRP	-0.425112	0.148005	-0.377758	0.374249	0.50588	0.462373
LAML	-0.148522	0.268132	-0.142123	0.435703	0.176058	-0.0580494
LGG	-0.383684	0.502018	-0.39632	0.103239	0.533316	0.369855
LIHC	-0.0703528	0.166301	-0.235055	0.348122	0.0326041	0.305921
LUAD	-0.179774	0.0607244	-0.133128	0.259159	0.298437	0.390932
LUSC	-0.229964	0.189461	-0.172628	-0.00977207	0.0614186	0.394085
MESO	-0.278626	-0.100184	-0.0722204	0.438476	-0.112675	0.218939
OV	-0.12609	0.222841	-0.0700161	0.335487	-0.0803905	0.249752
PAAD	-0.350791	-0.187762	-0.528713	0.350336	0.184151	0.299931
PCPG	-0.452541	-0.168058	-0.233133	0.400102	-0.10271	0.193774
PRAD	-0.232442	-0.138829	-0.129318	0.522825	0.190796	-0.208152
READ	-0.153393	0.307837	-0.0659894	-0.0116694	0.252476	0.000755166
SARC	-0.517783	0.0703046	-0.289037	0.368142	0.163282	0.14778
SKCM	-0.108865	-0.0151608	-0.12107	0.454282	0.204673	0.0685791
STAD	-0.159851	0.0238116	-0.312404	0.162584	0.218113	0.260286
TGCT	0.281551	0.676199	-0.0622497	-0.0736009	0.484645	0.14693
THCA	-0.115789	-0.132777	-0.149014	-0.0568493	-0.316348	0.292122
THYM	-0.0202606	0.064713	-0.0598633	-0.0830366	0.283927	-0.12371
UCEC	-0.0594791	-0.0114022	-0.0507495	0.477441	-0.0970976	0.183698
UCS	-0.202461	0.128025	-0.116883	0.40745	0.0462064	0.283639
UVM	-0.225879	0.0345288	0.0643006	0.682888	0.384083	0.446154
